# Supplementary material for: Development and Validation of an LC-MS/MS Method for the Quantitative Determination of Contezolid in Human Plasma and Cerebrospinal Fluid
Source: MDPI journal article supplement (doi:10.3390/ph16010032), 2022-12-26
Supplement: s1 [file s1]

## Supplementary Materials

1. Comparison of analysis results under different conditions.

1.1 Comparison under different mobile phases.

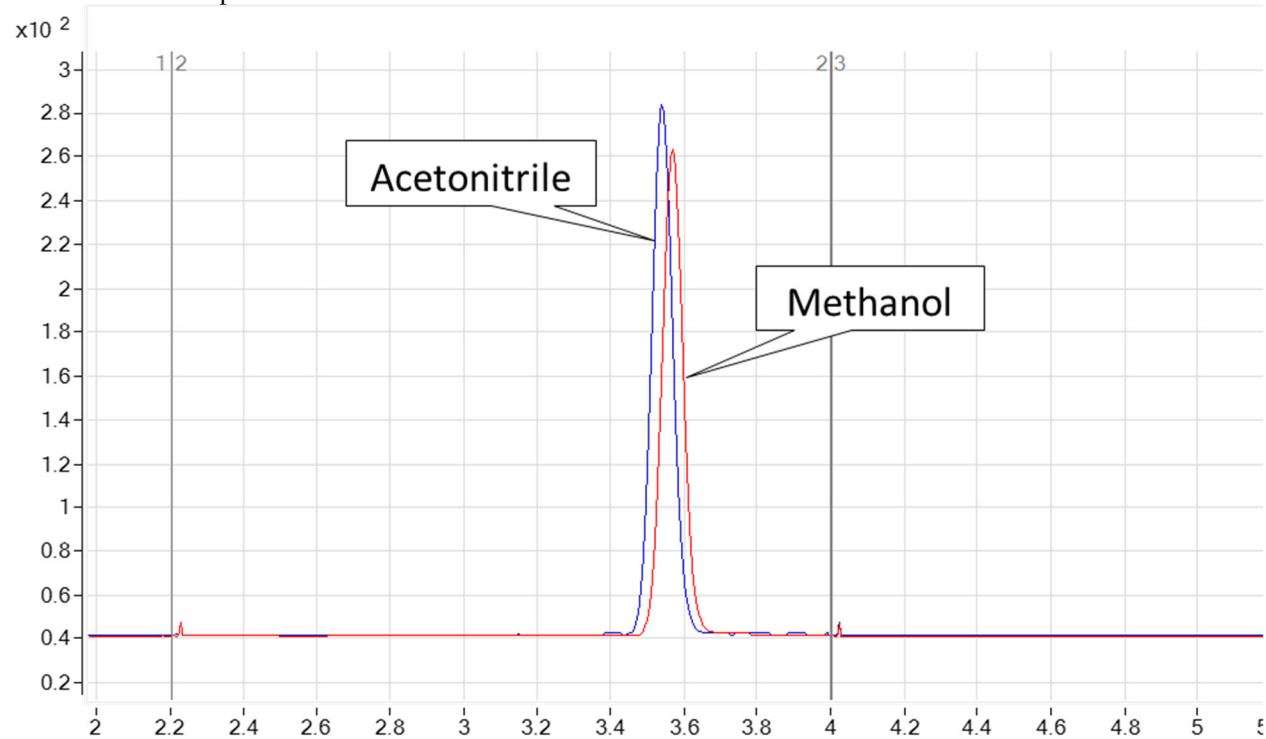

**Figure S1a** Comparison of chromatograms between methanol and acetonitrile as mobile phase B.

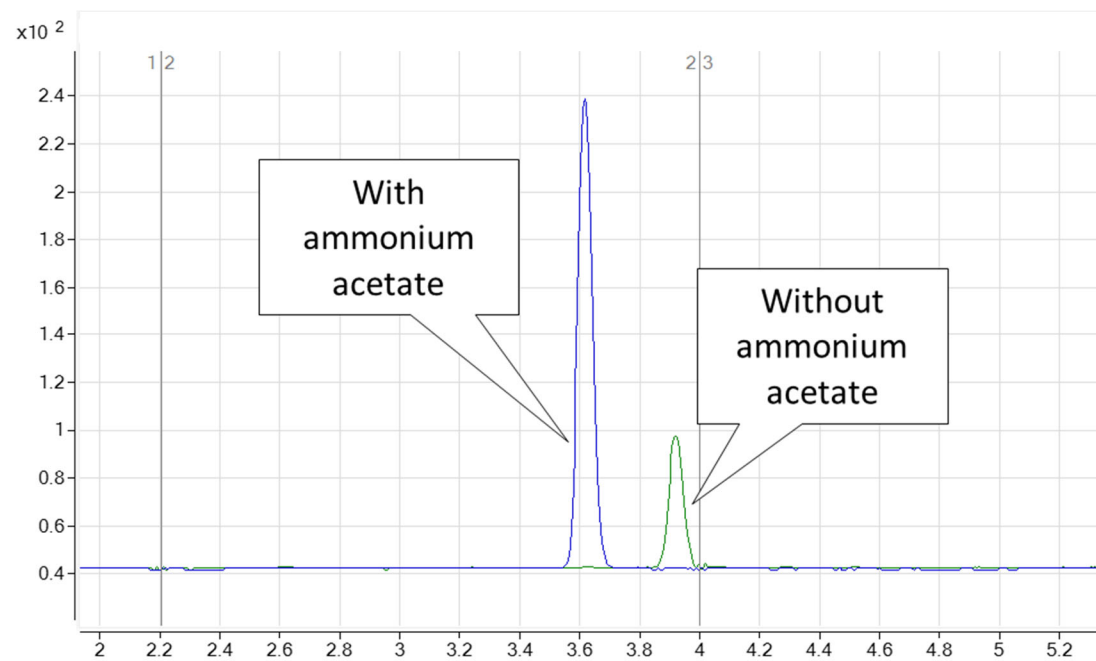

**Figure S1b** Comparison of chromatograms between with and without ammonium acetate in mobile phase.

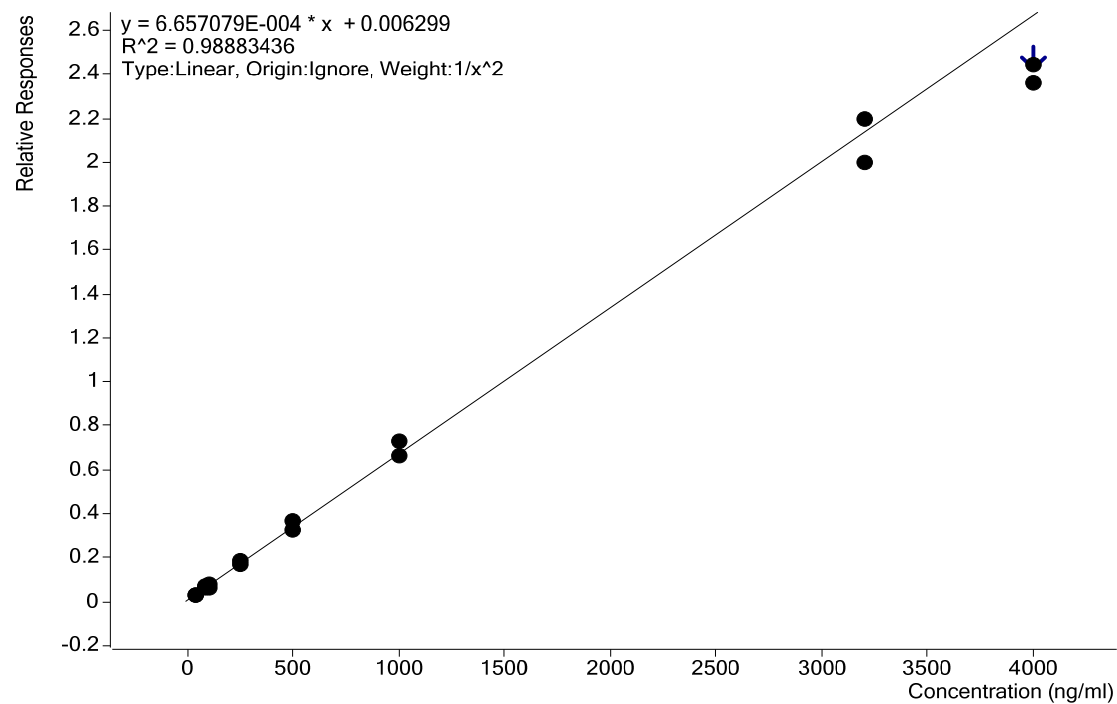

**Figure S1c** Calibration curve of 0.1% FA in water as mobile phase A and 0.1% FA in acetonitrile as mobile phase B.

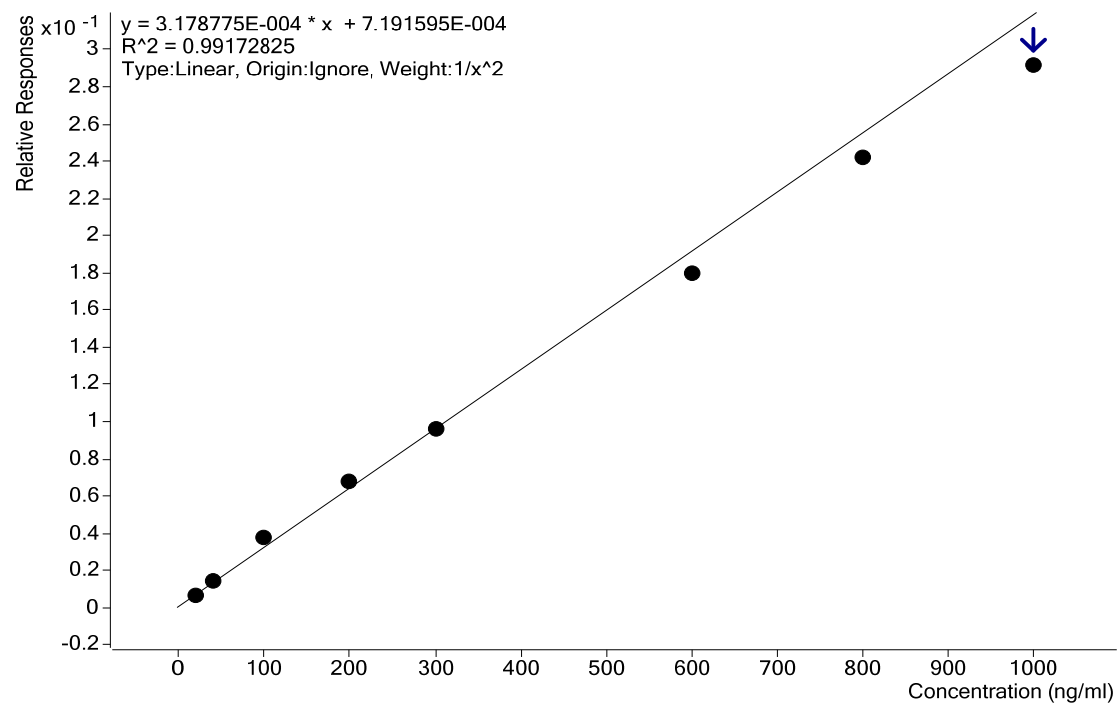

**Figure S1d** Calibration curve of 0.1% FA in 5 mM aqueous ammonium acetate solution as mobile phase A and 0.1% FA in 5 mM ammonium acetate acetonitrile: water (90:10, v/v) solution as mobile phase B.

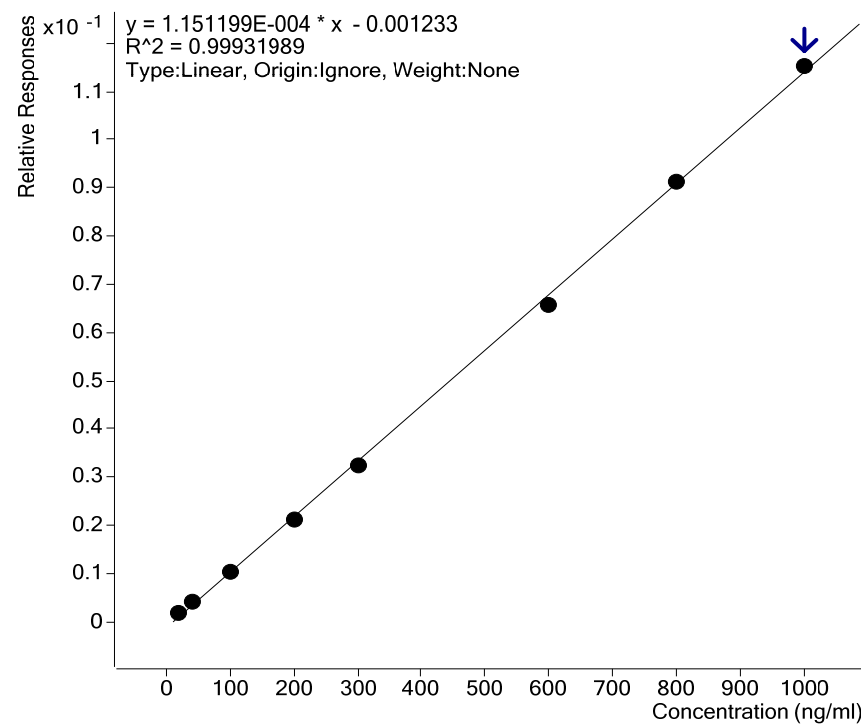

**Figure S1e** Calibration curve of 0.1% FA in 10 mM aqueous ammonium acetate solution as mobile phase A and 0.1% FA in 5 mM ammonium acetate acetonitrile: water (90:10, v/v) solution as mobile phase B.

## 1.2 Comparison between different ESI mode.

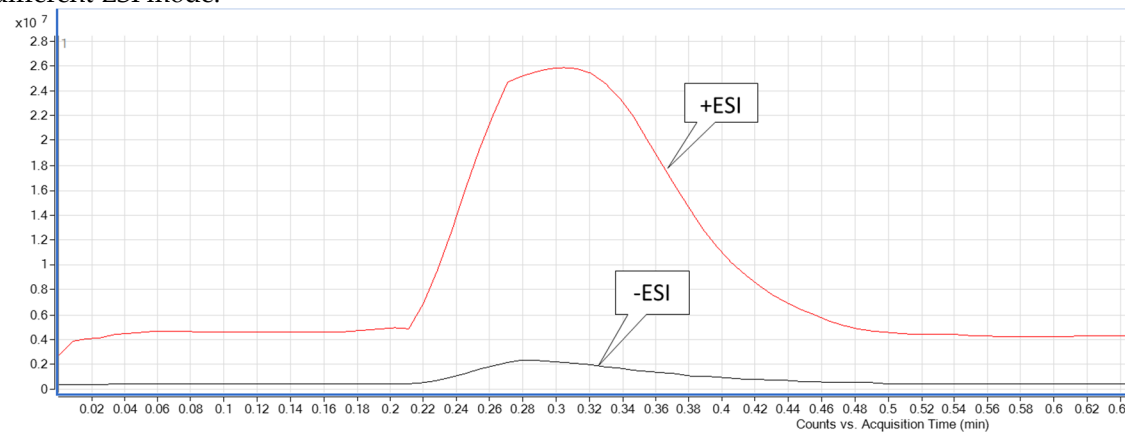

**Figure S2** Comparison of chromatograms between positive ESI (+ESI) and negative ESI (-ESI) mode.

### 1.3 Comparison between different columns.

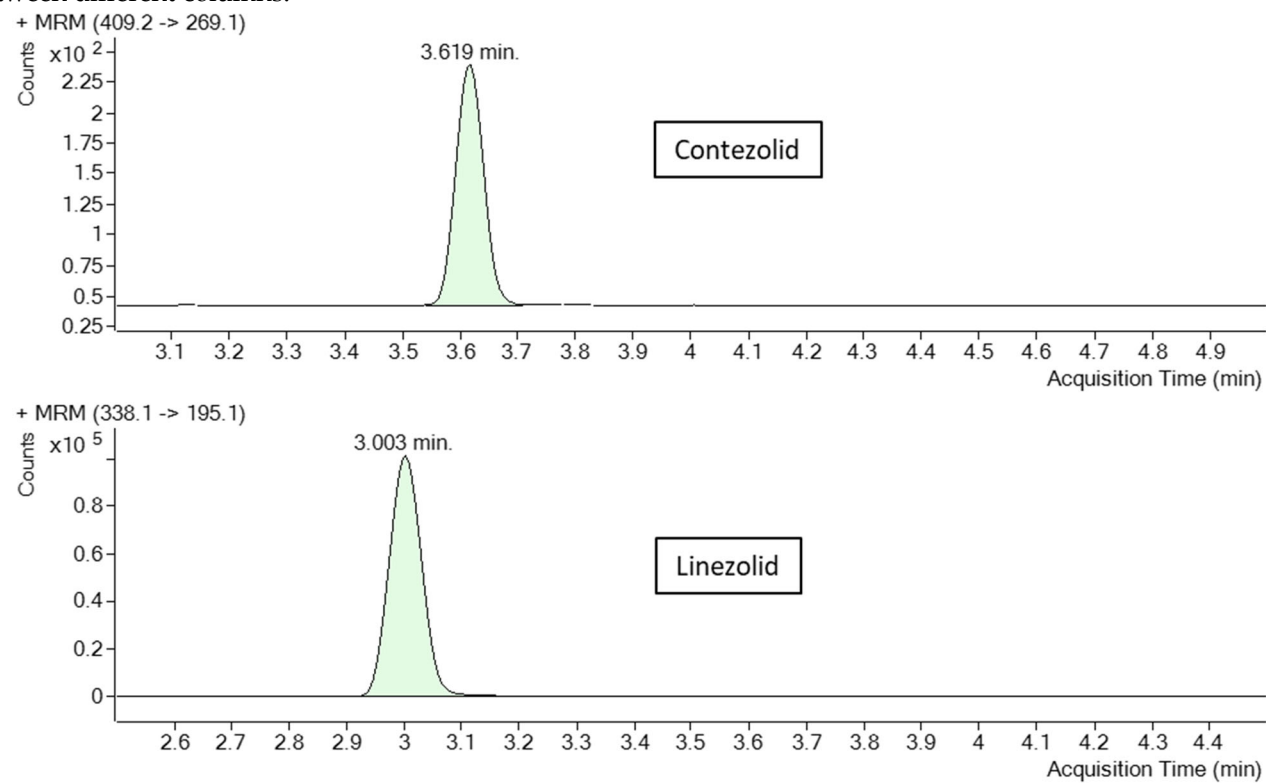

**Figure S3a** Chromatogram when using Eclipse Plus c18 3.5µm 2.1\*100mm.

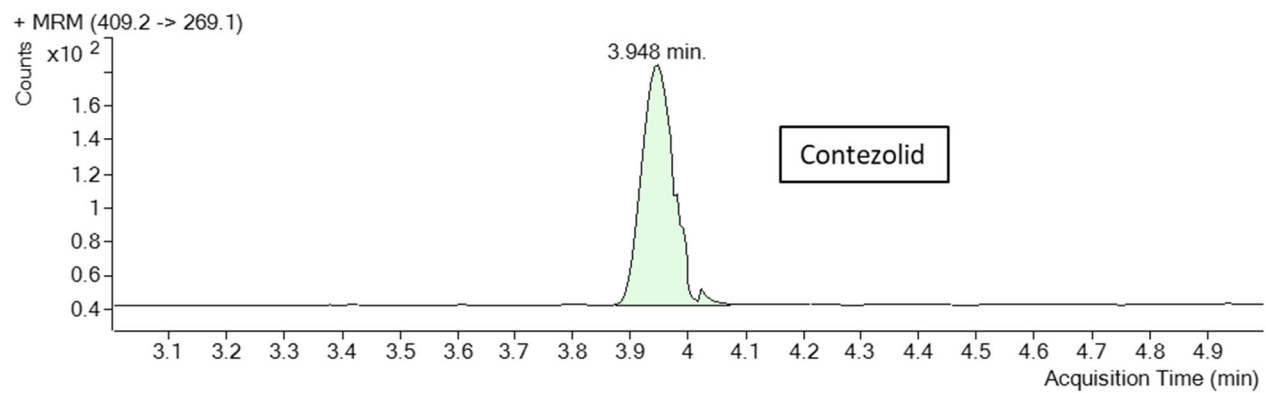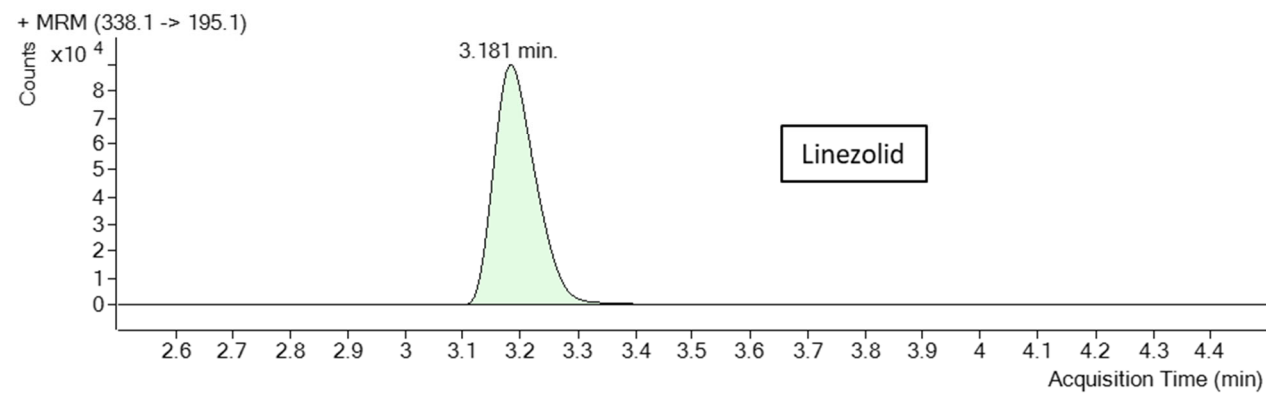

**Figure S3b** Chromatogram when using Zorbax SB- c18 3.5um 2.1\*100mm.



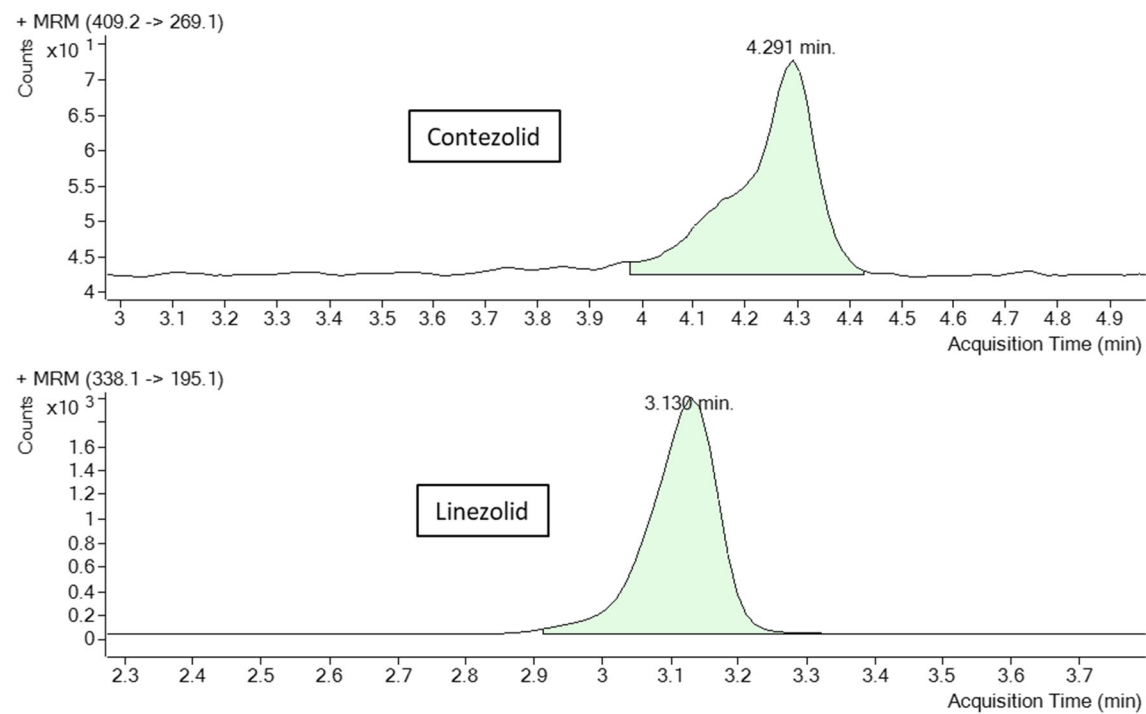

**Figure S3c** Chromatogram when using SB-c18 1.8um 4.6\*100mm.

## 2. Calibration curves.

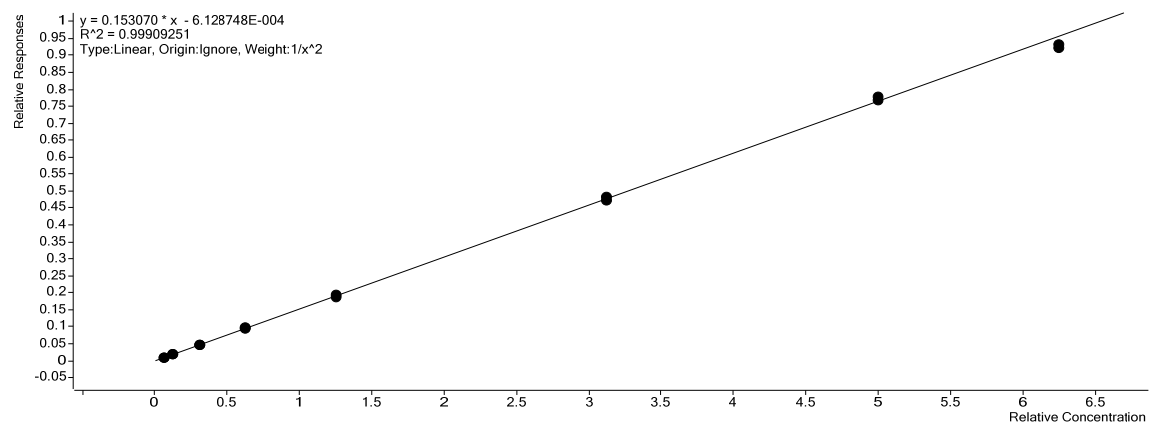

**Figure S4a** Calibration curve for quantitative analysis of cotezolid in plasma.

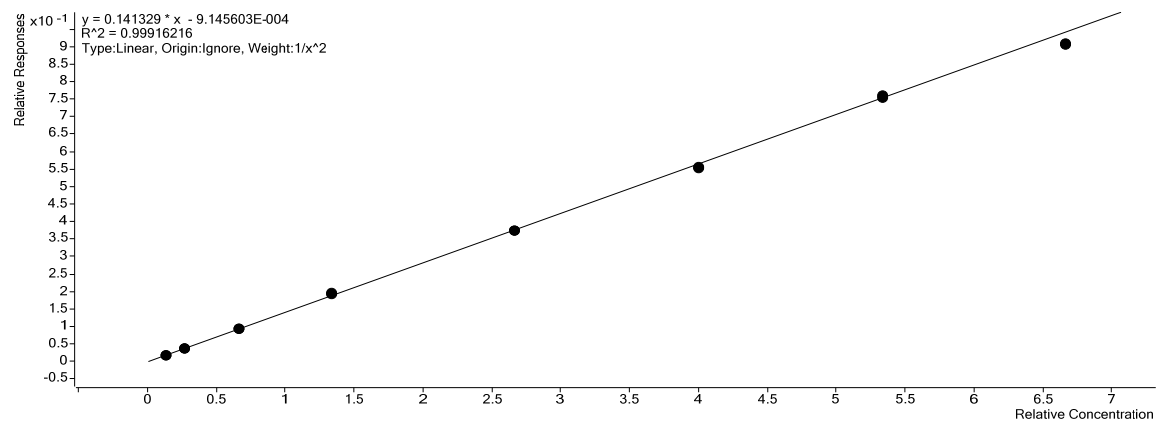

**Figure S4b** Calibration curve for quantitative analysis of cotezolid in CSF.

### 3. Mass Spectrums

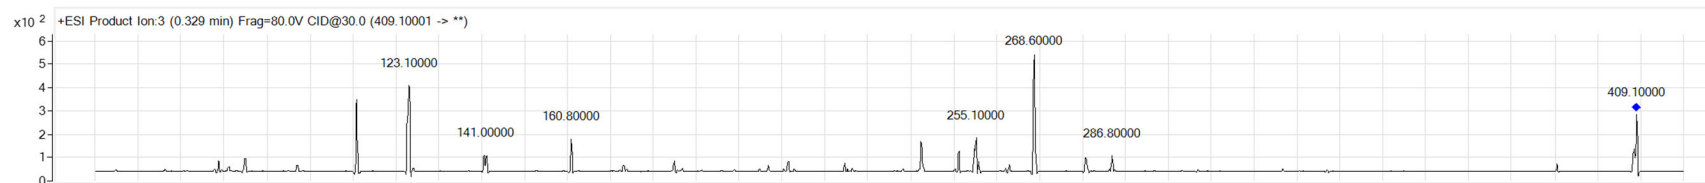

**Figure S5a** Mass Spectrum of contezolid.

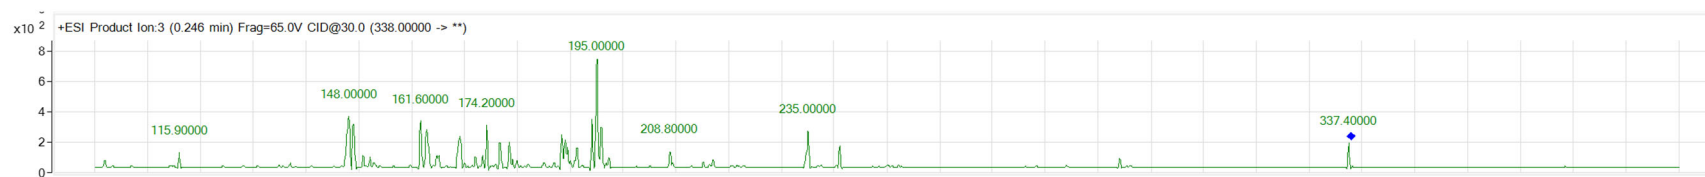

**Figure S5b** Mass Spectrum of linezolid.
